# Supplementary material for: Australian Veterinarians’ Perceptions Regarding the Zoonotic Potential of Mycobacterium avium Subspecies Paratuberculosis
Source: MDPI journal article supplement (doi:10.3390/vetsci7010033), 2020-03-19
Supplement: s1 [file s1]

Article

# Australian Veterinarians' Perceptions Regarding the Zoonotic Potential of *Mycobacterium avium* Subspecies *Paratuberculosis*

Kamal R. Acharya, Karren M. Plain, Richard J. Whittington and Navneet K. Dhand \*

Sydney School of Veterinary Science, Faculty of Science, The University of Sydney, 425 Werombi Road, Camden, 2570, New South Wales, Australia; kach8080@uni.sydney.edu.au (K.R.A.); karren.plain@sydney.edu.au (K.M.P.); richard.whittington@sydney.edu.au (R.J.W.)

\* Correspondence: navneet.dhand@sydney.edu.au; Tel: +61-2-9351-1669; Fax: +61-2-9351-1618

Received: 17 February 2020; Accepted: 9 March 2020; Published: date

**Abstract:** Public concerns over exposure to *Mycobacterium avium* subspecies *paratuberculosis* (MAP) or MAP components via foods of animal origin could have negative trade consequences, despite the absence of conclusive scientific evidence of a causal association between *Mycobacterium avium* subspecies *paratuberculosis* (MAP) and Crohn's disease (CD). This study was conducted among Australian veterinarians to understand (a) their perceptions regarding the role of MAP in the causation of CD (an ordinal outcome), and (b) their consideration of the adoption of the precautionary principle against Johne's disease (JD; a binary outcome). Ordinal and binary logistic regression analyses were performed to evaluate the association of explanatory variables with the above outcomes, respectively. Almost one-third of the respondents (32.2%) considered that MAP was likely to be involved in the causation of CD whereas more than two-thirds (69.8%) agreed with the adoption of the precautionary principle against JD. Veterinarians who were concerned about exposure to and/or getting infected with MAP were more likely to consider MAP as a causative agent of CD (odds ratio: 7.63; 95% CI: 1.55, 37.63) and favor the adoption of the precautionary principle against JD (odds ratio: 6.20; 95% CI: 1.90, 20.25). Those perceiving MAP as a causative agent of CD were also more likely to favor the adoption of the precautionary principle against JD (odds ratio: 13.2; 95% CI: 1.26, 138.90). The results suggest that Australian veterinarians, particularly those who consider MAP as a causative agent of CD are concerned about exposure to MAP and favor the adoption of the precautionary principle against JD. These findings can be useful for animal health authorities for designing JD control programs and policies.

---

**Table S1.** Frequency table of categorical explanatory variables used in the analysis in the study conducted in Australia in 2016 to investigate the veterinarians' perceptions regarding the zoonotic potential of *Mycobacterium avium* subspecies *paratuberculosis*.

| Variables                                         | Categories                 | Count (%) | N   | No response (%) |
|---------------------------------------------------|----------------------------|-----------|-----|-----------------|
| Mode of survey administration                     | ACV conference             | 35 (34.3) | 102 | 0 (0.0)         |
|                                                   | ASV conference             | 22 (21.6) |     |                 |
|                                                   | Others                     | 45 (44.1) |     |                 |
| Year of graduation                                | Before 1980                | 18 (17.7) | 102 | 0 (0.0)         |
|                                                   | 1980 to 2000               | 47 (46.1) |     |                 |
|                                                   | After 2000                 | 37 (36.3) |     |                 |
| Gender                                            | Female                     | 33 (32.7) | 101 | 1(1.0)          |
|                                                   | Male                       | 68 (67.3) |     |                 |
| Level of education                                | Bachelor's degree          | 57 (55.9) | 102 | 0 (0.0)         |
|                                                   | Higher Education           | 45 (44.1) |     |                 |
| Geography of work                                 | New South Wales            | 39 (38.2) | 102 | 0 (0.0)         |
|                                                   | Victoria                   | 31 (30.4) |     |                 |
|                                                   | Others                     | 32 (31.4) |     |                 |
| Location of clients                               | Rural only                 | 88 (86.3) | 102 | 0 (0.0)         |
|                                                   | Others                     | 14 (13.7) |     |                 |
| Type of work                                      | Private practice only      | 43 (44.3) | 97  | 5 (5.0)         |
|                                                   | Private and other practice | 46 (47.4) |     |                 |
|                                                   | No private practice        | 8 (8.3)   |     |                 |
| Animal worked with                                | Food animals               | 58 (63.1) | 92  | 10 (9.9)        |
|                                                   | Non-food animals           | 20 (21.7) |     |                 |
|                                                   | Both                       | 14 (15.2) |     |                 |
| Laboratory used                                   | Private                    | 51 (53.1) | 96  | 6 (5.9)         |
|                                                   | Others                     | 45 (46.9) |     |                 |
| Continuing education on JD                        | Yes                        | 58 (57.4) | 101 | 1 (1.0)         |
|                                                   | No                         | 43 (42.6) |     |                 |
| Market assurance program training                 | Yes                        | 63 (62.4) | 101 | 1 (1.0)         |
|                                                   | No                         | 38 (37.6) |     |                 |
| Consultation on JD control and management on farm | Yes                        | 25 (29.1) | 86  | 16 (15.7)       |
|                                                   | Sometimes                  | 46 (53.5) |     |                 |
|                                                   | No                         | 15 (17.5) |     |                 |
| Consultation on JD diagnosis on farm              | Yes                        | 15 (17.3) | 87  | 15 (14.8)       |
|                                                   | Sometimes                  | 53 (61.0) |     |                 |
|                                                   | No                         | 19 (21.8) |     |                 |
| Diagnosis of JD <sup>a</sup>                      | Single species             | 29 (33.3) | 87  | 15 (14.8)       |
|                                                   | Multi-species              | 38 (43.7) |     |                 |
|                                                   | None                       | 20 (23.0) |     |                 |
| Awareness on BJD management programs in Australia | Agree                      | 41 (51.3) | 80  | 22 (21.6)       |
|                                                   | Neutral                    | 20 (25.0) |     |                 |
|                                                   | Disagree                   | 19 (23.8) |     |                 |
|                                                   | Yes                        | 64 (78.1) |     |                 |

| Variables                                                                                 | Categories                 | Count (%) | N   | No response (%) |
|-------------------------------------------------------------------------------------------|----------------------------|-----------|-----|-----------------|
| Mode of survey administration                                                             | ACV conference             | 35 (34.3) | 102 | 0 (0.0)         |
|                                                                                           | ASV conference             | 22 (21.6) |     |                 |
|                                                                                           | Others                     | 45 (44.1) |     |                 |
| Awareness on BJD review by Animal Health Australia                                        | No                         | 18 (22.0) | 77  | 25 (24.6)       |
| Awareness of OJD regulatory provisions                                                    | Agree                      | 36 (46.8) |     |                 |
|                                                                                           | Neutral                    | 17 (22.1) |     |                 |
|                                                                                           | Disagree                   | 24 (31.2) |     |                 |
| Concern index on MAP exposure and infection                                               | Concerned/highly concerned | 61 (71.8) | 85  | 17 (16.7)       |
|                                                                                           | No/some concerns           | 24 (28.2) |     |                 |
| Know a Crohn's disease patient                                                            | Yes                        | 59 (67.8) | 87  | 15 (14.8)       |
|                                                                                           | No                         | 28 (32.2) |     |                 |
| Updated knowledge on JD                                                                   | Agree                      | 41 (47.1) | 87  | 15 (14.8)       |
|                                                                                           | Neutral                    | 25 (28.7) |     |                 |
|                                                                                           | Disagree                   | 21 (24.1) |     |                 |
| Agreement Index on MAP as a zoonotic agent                                                | Agree                      | 34 (39.5) | 86  | 16 (15.7)       |
|                                                                                           | Neutral                    | 10 (11.6) |     |                 |
|                                                                                           | Disagree                   | 42 (48.8) |     |                 |
| Proportion of clients with JD infected properties                                         | High                       | 25 (33.8) | 74  | 28 (27.5)       |
|                                                                                           | Medium                     | 24 (32.4) |     |                 |
|                                                                                           | Low                        | 25 (33.8) |     |                 |
| Proportions of clients who had initiated control programs or were intending to control JD | High                       | 22 (30.6) | 72  | 37 (36.3)       |
|                                                                                           | Medium                     | 25 (34.7) |     |                 |
|                                                                                           | Low                        | 25 (34.7) |     |                 |

<sup>a</sup> Diagnosis made in single species (bovine or ovine), multi-species (both bovine and ovine) and none; ACV: Australian Cattle Veterinarians; ASV: Australian Sheep Veterinarians; JD: Johne's disease; OJD: Ovine Johne's disease; BJD: Bovine Johne's disease MAP: *Mycobacterium avium* subspecies *paratuberculosis*.
